# Supplementary material
Source: PubMed Central journal article supplement (PMC3423452)
Supplement: supp_186.3.255_Navani_ODS.pdf [file supp_186.3.255_Navani_ODS.pdf]

BUS-TBNA PREVENTS MEDIASTINOSCOPIES IN THE DIAGNOSIS OF ISOLATED MEDIASTINAL LYMPHADENOPATHY: A PROSPECTIVE TRIAL

Neal Navani, David R. Lawrence, Shyam Kolvekar, Martin Hayward, Dorcas McAsey, Gabrijela Kocjan, Mary Falzon, Arrigo Capitanio,  
Penny Shaw, Stephen Morris, Rumana Z. Omar, Sam M. Janes, on behalf of the REMEDY trial investigators

ONLINE DATA SUPPLEMENT

Supplementary Figure E1: Decision tree model of patients with isolated mediastinal lymphadenopathy. We assume a sensitivity of 100% for the mediastinoscopy strategy. Probabilities for the EBUS-TBNA strategy are obtained from the REMEDY trial.

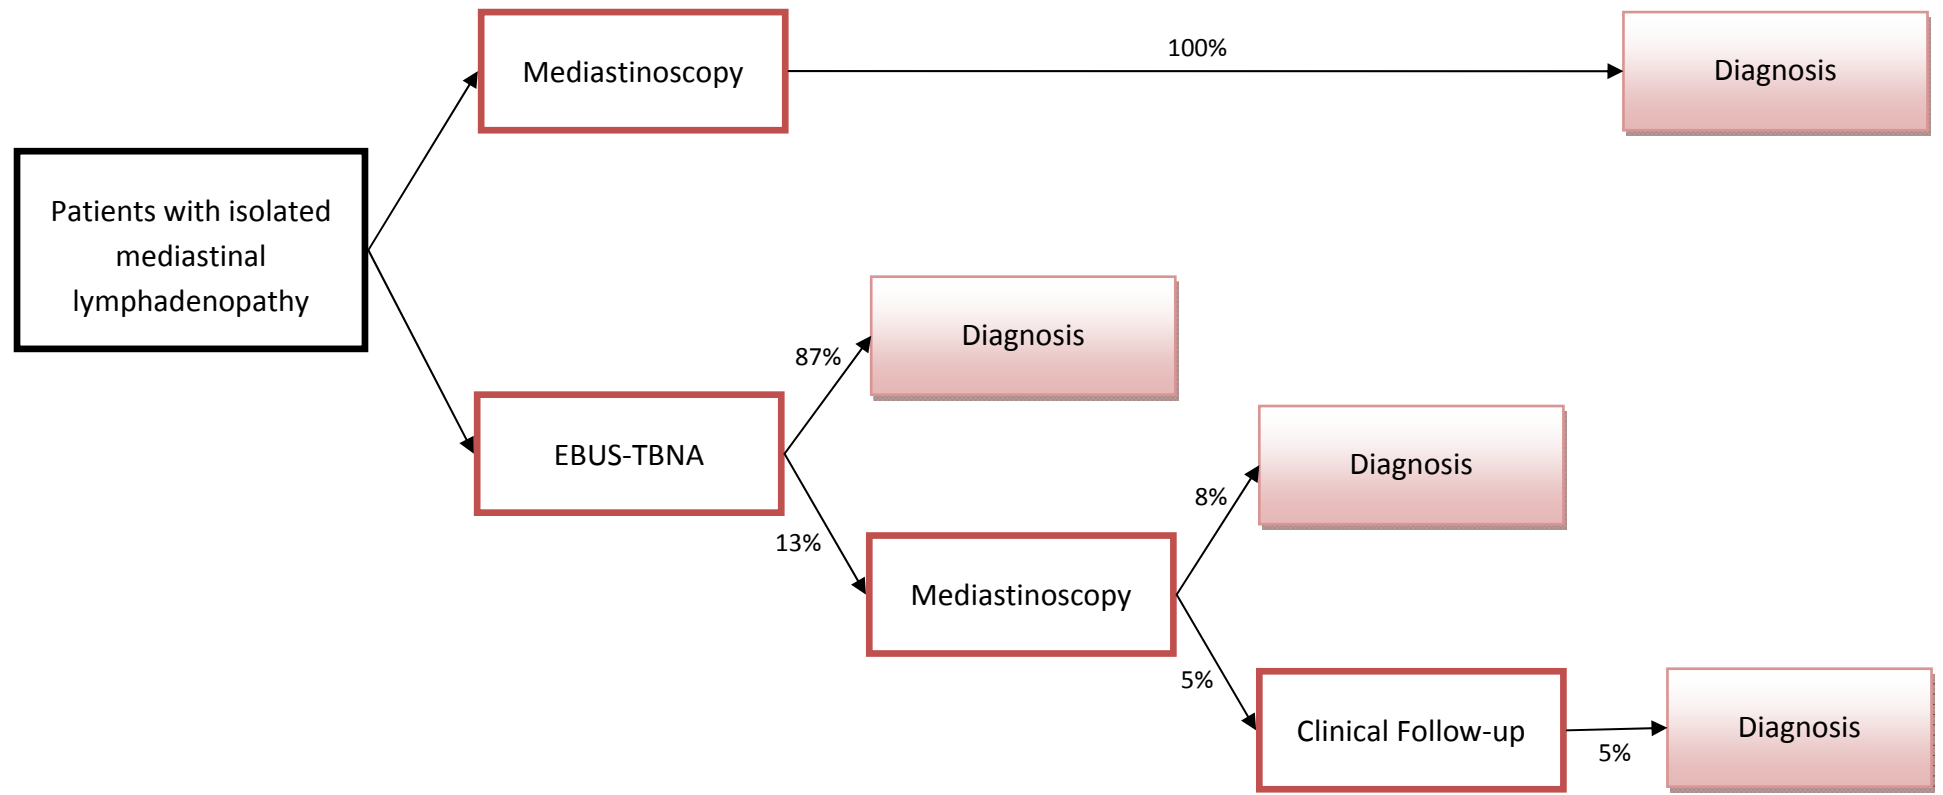

Supplementary Table E1: Cost of the EBUS-TBNA procedure to the NHS, assuming 250 cases per year and 3 cases per session. All costs are measured in 2010-11 £UK.

1 £UK = 1.58 USD (1<sup>st</sup> February 2012)

| Resource                                                                          | Cost per year (£) | Cost per procedure (£) | Notes                                                                            |
|-----------------------------------------------------------------------------------|-------------------|------------------------|----------------------------------------------------------------------------------|
| Capital costs of 2 EBUS echoendoscopes                                            | 28,000            | 112                    | Total cost of £140,000 (including 1 processor) assumed to be spread over 5 years |
| EBUS-TBNA needle                                                                  | 43,750            | 175                    | Source: manufacturer's price                                                     |
| Maintenance contract                                                              | 9000              | 36                     | Source: UCLH                                                                     |
| 2 Consultants for 2.5 sessions per week                                           | 50,000            | 200                    | Source: UCLH                                                                     |
| 2 Nurses, 1 health care assistant, 1 recovery nurse per session                   | 68,750            | 275                    | Source: UCLH                                                                     |
| Sterilisation                                                                     | 13,750            | 55                     | Source: UCLH                                                                     |
| Pathology                                                                         | 36,250            | 145                    | Source: UCLH                                                                     |
| Administration                                                                    | 10,000            | 40                     | Source: UCLH                                                                     |
| Overheads (endoscopy suite, portering, facilities, drug costs) and Indirect costs | 86,000            | 344                    | Source: UCLH                                                                     |
| <b>Total cost of EBUS-TBNA</b>                                                    | <b>345,500</b>    | <b>1382</b>            |                                                                                  |

Supplementary Table E2: Clinical characteristics of patients with isolated mediastinal lymphadenopathy undergoing mediastinoscopy between 2007 and 2008

|                           | Mediastinoscopy only<br>(n=68) |
|---------------------------|--------------------------------|
| Age                       |                                |
| < 30                      | 3 (4%)                         |
| 30 – 49                   | 25 (37%)                       |
| 50 – 69                   | 29 (43%)                       |
| >69                       | 11 (16%)                       |
| Median (range)            | 53 (25 – 85)                   |
| Gender                    |                                |
| Male                      | 38 (56%)                       |
| Female                    | 30 (44%)                       |
| Ethnicity                 |                                |
| Caucasian                 | 36 (53%)                       |
| Asian                     | 22 (32%)                       |
| African                   | 9 (13%)                        |
| Caribbean                 | 0 (0%)                         |
| Other                     | 1 (1%)                         |
| Symptoms                  |                                |
| Cough                     | 31 (46%)                       |
| Dyspnoea                  | 8 (12%)                        |
| Weight loss               | 8 (12%)                        |
| Fevers / night sweats     | 5 (7%)                         |
| Chest pain                | 10 (15%)                       |
| Other                     | 2 (3%)                         |
| None                      | 4 (6%)                         |
| Final Diagnosis           |                                |
| Sarcoidosis Stage 1       | 31 (46%)                       |
| Sarcoidosis Stage 2       | 2 (3%)                         |
| Tuberculosis              | 17 (25%)                       |
| Lymphoma                  | 5 (7%)                         |
| Extra-thoracic malignancy | 2 (3%)                         |
| Lung cancer               | 1 (1%)                         |
| Reactive lymphadenopathy  | 10 (15%)                       |
